# Supplementary material
Source: PubMed Central journal article supplement (PMC5837832)
Supplement: jcsm.14.3.309s1.pdf [file jcsm.14.3.309s1.pdf]

Table S1. Hypertensive medication and comorbidities

| Variables                                 | N (%)     |
|-------------------------------------------|-----------|
| Number of anti-HT medications $\geq 2$    | 3/13 (23) |
| Type of anti-HT medication:               |           |
| • Angiotensin converting enzyme inhibitor | 3/13 (23) |
| • Angiotensin II receptor blocker         | 6/13 (46) |
| • Calcium channel blocker                 | 5/13 (39) |
| • Hydrochlorothiazide                     | 3/13 (23) |
| Comorbidities:                            |           |
| • Hyperlipidemia                          | 4/13 (31) |
| • Depression                              | 1/13 (8)  |
| • Hyperthyreosis                          | 1/13 (8)  |
| • Hypothyreosis                           | 1/13 (8)  |

---

HT=Hypertensive

Table S2. Blood pressure status before antihypertensive medication wash-out and after interventions (n=12)

|                                        | <b>Screening visit</b><br><b>(prior to wash-out of</b><br><b>antihypertensive</b><br><b>medication)</b> | <b>CPAP</b> | <b>AZT</b> | <b>AZT plus CPAP</b> | <b>P value</b> |
|----------------------------------------|---------------------------------------------------------------------------------------------------------|-------------|------------|----------------------|----------------|
| Office systolic blood pressure (mmHg)  | 147 (15)                                                                                                | 153 (11)    | 145 (7)    | 144 (7)              | 0.073          |
| Office mean arterial pressure (mmHg)   | 104 (10)                                                                                                | 106 (8)     | 102 (7)    | 101 (7)              | 0.186          |
| Office diastolic blood pressure (mmHg) | 82 (10)                                                                                                 | 83 (9)      | 80 (10)    | 80 (8)               | 0.476          |
| Office heart rate (bpm)                | 63 (8)                                                                                                  | 63 (9)      | 62 (6)     | 63 (8)               | 0.994          |

Data shown as mean (SD).

Table S3. Biochemistry

|                      | CPAP<br>(n=13) |             | AZT<br>(n=13) |             | AZT plus CPAP<br>(n=12) |             | P value               |
|----------------------|----------------|-------------|---------------|-------------|-------------------------|-------------|-----------------------|
|                      | Pre            | Post        | Pre           | Post        | Pre                     | Post        |                       |
| pH                   | 7.41 (0.02)    | 7.40 (0.02) | 7.40 (0.01)   | 7.33 (0.02) | 7.40 (0.02)             | 7.32 (0.03) | <0.001 <sup>a,b</sup> |
| Base excess (mmol/L) | 1.7 (1.3)      | 1.6 (1.6)   | 2.1 (0.9)     | -5.7 (1.5)  | 1.9 (1.7)               | -5.6 (1.8)  | <0.001 <sup>a,b</sup> |
| Lactate (mmol/L)     | 1,27 (0.32)    | 1.28 (0.24) | 1.23 (0.18)   | 1.25 (0.20) | 1.34 (0.26)             | 1.15 (0.25) | 0.28                  |
| Hemoglobin (g/L)     | 141 (19)       | 138 (14)    | 141 (12)      | 146 (11)    | 138 (11)                | 143 (12)    | 0.148                 |
| Glucose (mmol/L)     | 6.59 (1.33)    | 6.61 (2.07) | 6.74 (1.85)   | 6.86 (2.05) | 6.96 (1.69)             | 6.90 (1.57) | 0.91                  |

Data shown as mean (SD). Abbreviations: a= p<0.05 for AZT to CPAP comparison; b= p<0.05 for AZT/CPAP to CPAP comparison; c= p<0.05 AZT to AZT/CPAP comparison.

Table S4. Treatment related side effects

| <b>Adverse events n (%)</b> | <b>CPAP<br/>(n=13)</b> | <b>AZT<br/>(n=13)</b> | <b>AZT plus CPAP<br/>(n=12)</b> |
|-----------------------------|------------------------|-----------------------|---------------------------------|
| Paresthesia                 | 0/13 (0)               | 6/13 (46)             | 4/12 (33)                       |
| Dysguesia                   | 0/13 (0)               | 1/13 (8)              | 0/12 (0)                        |
| Diarrhea                    | 0/13 (0)               | 1/13 (8)              | 1/12 (8)                        |
| Dyspepsia                   | 0/13 (0)               | 4/13 (31)             | 3/12 (25)                       |
| Nocturia                    | 0/13 (0)               | 1/13 (8)              | 1/12 (8)                        |
| Decreased libido            | 0/13 (0)               | 1/13 (8)              | 0/12 (0)                        |
